# Supplementary material
Source: Springer Nature journal article supplement (https://www.springermedizin.de/resource/supplementary/12931_2010_1057_MOESM1_ESM.pdf/9425540)

**■ Normoxia****□ Chronic hypoxia****■ Monocrotaline****A**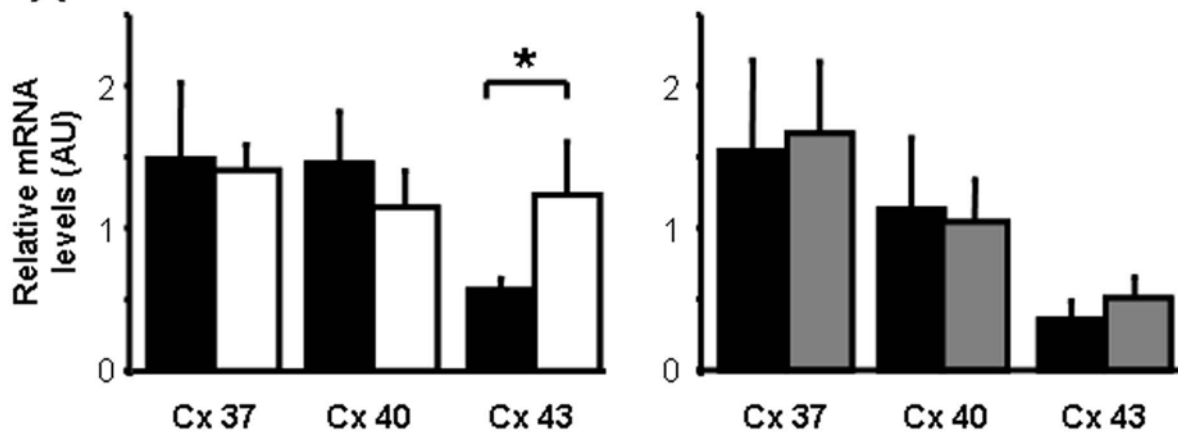**B**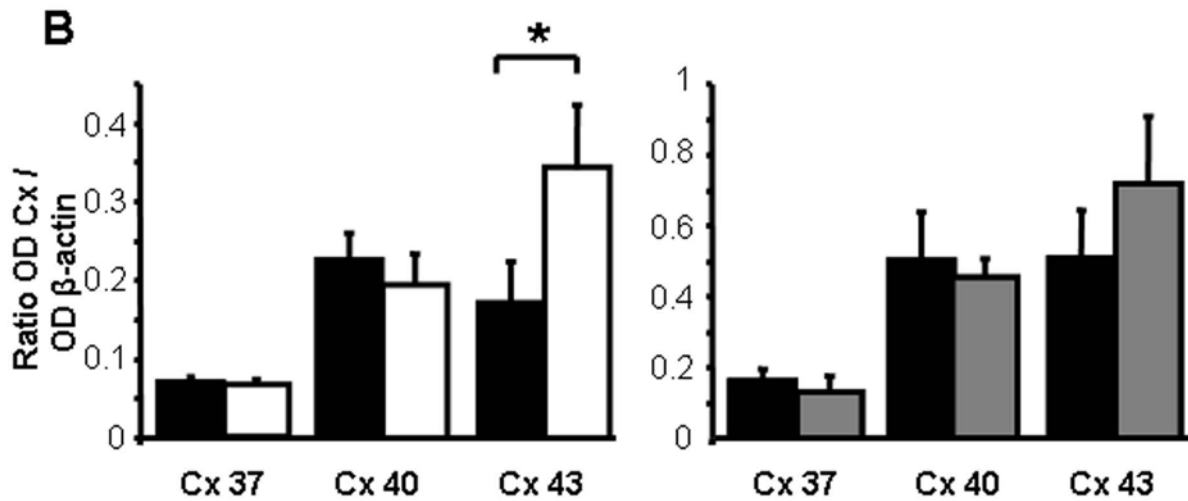

Supplement: MOESM1 [file 9425540]
